# THE AMERICAN JOURNAL OF PSYCHIATRY

## EDITOR-IN-CHIEF

Robert Freedman, M.D.

## DEPUTY EDITORS

David A. Lewis, M.D.

Robert Michels, M.D.

Daniel S. Pine, M.D.

Susan K. Schultz, M.D.

Carol A. Tamminga, M.D.

## EDITORIAL STAFF

### Editorial Director

Michael D. Roy

### Senior Editor/Features Writer

Jane Weaver, E.L.S.

### Senior Editor

John J. Guardiano, Ph.D.

### Production Manager

Julie C. Blair

### Graphic Designer

Steve Hennessey

### Assistant Editor

Angela Moore

### Editorial Support

### Services Manager

Kourtney Skinner

### Editorial Assistant

Samantha Luck

### Administrative Assistant

Victoria Chihos

### Assistants to the Editors

Lois Lilienthal

Lindsay Karr

Rachel Hogg

Russell A. Scholl

## ASSOCIATE EDITORS

Kathleen T. Brady, M.D., Ph.D.

David A. Brent, M.D.

Linda Brzustowicz, M.D.

Cameron S. Carter, M.D.

Howard H. Goldman,  
M.D., Ph.D.

Daniel C. Javitt, M.D.

Bankole Johnson, M.D.

Ellen Leibenluft, M.D.

Jeffrey A. Lieberman, M.D.

Barbara Milrod, M.D.

Maria A. Oquendo, M.D.

Jerrold F. Rosenbaum, M.D.

A. John Rush, M.D.

Larry J. Siever, M.D.

Patricia Suppes, M.D., Ph.D.

Myrna M. Weissman, Ph.D.

## EDITOR EMERITUS

Nancy C. Andreasen,  
M.D., Ph.D.

## FORMER EDITORS

Amariah Brigham, M.D.

1844-1849

T. Romeyn Beck, M.D.

1849-1854

John P. Gray, M.D.

1854-1886

G. Alder Blumer, M.D.

1886-1894

Richard Dewey, M.D.

1894-1897

Henry M. Hurd, M.D.

1897-1904

Edward N. Brush, M.D.

1904-1931

Clarence B. Farrar, M.D.

1931-1965

Francis J. Braceland, M.D.

1965-1978

John C. Nemiah, M.D.

1978-1993

The American Journal of Psychiatry is online at [ajp.psychiatryonline.org](http://ajp.psychiatryonline.org)

# THE AMERICAN PSYCHIATRIC ASSOCIATION

1000 Wilson Blvd., Suite 1825, Arlington, VA 22209-3901  
(888) 357-7924 (toll-free inside the U.S. and Canada) / (703) 907-7300  
web site: [www.psych.org/](http://www.psych.org/) e-mail: [apa@psych.org](mailto:apa@psych.org)

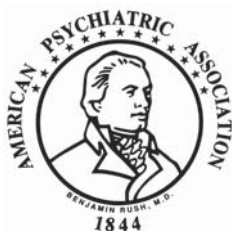

## OFFICERS 2009–2010

|                     |                                 |
|---------------------|---------------------------------|
| President           | Alan F. Schatzberg, M.D.        |
| President-Elect     | Carol A. Bernstein, M.D.        |
| Vice-President      | Jeffrey L. Geller, M.D., M.P.H. |
| Secretary-Treasurer | David Fassler, M.D.             |

## ASSEMBLY

|               |                           |
|---------------|---------------------------|
| Speaker       | Gary S. Weinstein, M.D.   |
| Speaker-Elect | Bruce A. Hershfield, M.D. |
| Recorder      | Ann Marie Sullivan, M.D.  |

## MEDICAL DIRECTOR'S OFFICE

|                                                                        |                                |
|------------------------------------------------------------------------|--------------------------------|
| Medical Director<br>and CEO                                            | James H. Scully, Jr., M.D.     |
| Chief Executive<br>Officer, American<br>Psychiatric<br>Publishing, Inc | Ronald E. McMillen             |
| Executive Director,<br>APIRE,<br>Division of Research                  | Darrel A. Regier, M.D., M.P.H. |
| Executive Director,<br>American Psychiatric<br>Foundation              | Paul T. Burke                  |

## BOARD OF TRUSTEES

|                           |                                  |
|---------------------------|----------------------------------|
| Becky Bay, M.D.           | Carolyn B. Robinowitz, M.D.      |
| Thomas K. Ciesla, M.D.    | Pedro Ruiz, M.D.                 |
| Mary Helen Davis, M.D.    | Jacqueline N. Smith, M.D.        |
| Melinda G. Fierros, M.D.  | Joyce A. Spurgeon, M.D.          |
| Dilip V. Jeste, M.D.      | Frederick J. Stoddard, Jr., M.D. |
| James E. Nininger, M.D.   | Nada L. Stotland, M.D., M.P.H.   |
| Roger Peele, M.D.         | John Chapman Urbaitis, M.D.      |
| Kayla M. Pope, M.D., J.D. | John J. Wernert III, M.D.        |
|                           | William M. Womack, M.D.          |

## AMERICAN PSYCHIATRIC PUBLISHING, INC

### BOARD OF DIRECTORS

|                          |                                         |
|--------------------------|-----------------------------------------|
| President and Chair      | Laura Weiss Roberts, M.D.               |
| Secretary                | Donna M. Norris, M.D.                   |
| Treasurer                | Joan A. Lang, M.D.                      |
| John M. Oldham,<br>M.D.  | Pedro Ruiz, M.D.                        |
| Katharine Phillips, M.D. | Donna E. Stewart, M.D.,<br>F.R.C.P.(C.) |
|                          | Amy Ursano, M.D.                        |

### EX-OFFICIO MEMBERS

|                                                           |                               |
|-----------------------------------------------------------|-------------------------------|
| APA President                                             | Alan F. Schatzberg, M.D.      |
| APA President-Elect                                       | Carol A. Bernstein, M.D.      |
| APA Secretary-<br>Treasurer                               | David Fassler, M.D.           |
| APA Medical Director<br>and CEO                           | James H. Scully, Jr., M.D.    |
| Editor-in-Chief,<br>The American Journal<br>of Psychiatry | Robert Freedman, M.D.         |
| Editor-in-Chief, Books                                    | Robert E. Hales, M.D., M.B.A. |

The American Journal of Psychiatry is online at [ajp.psychiatryonline.org](http://ajp.psychiatryonline.org)
