# THE AMERICAN JOURNAL OF PSYCHIATRY

---

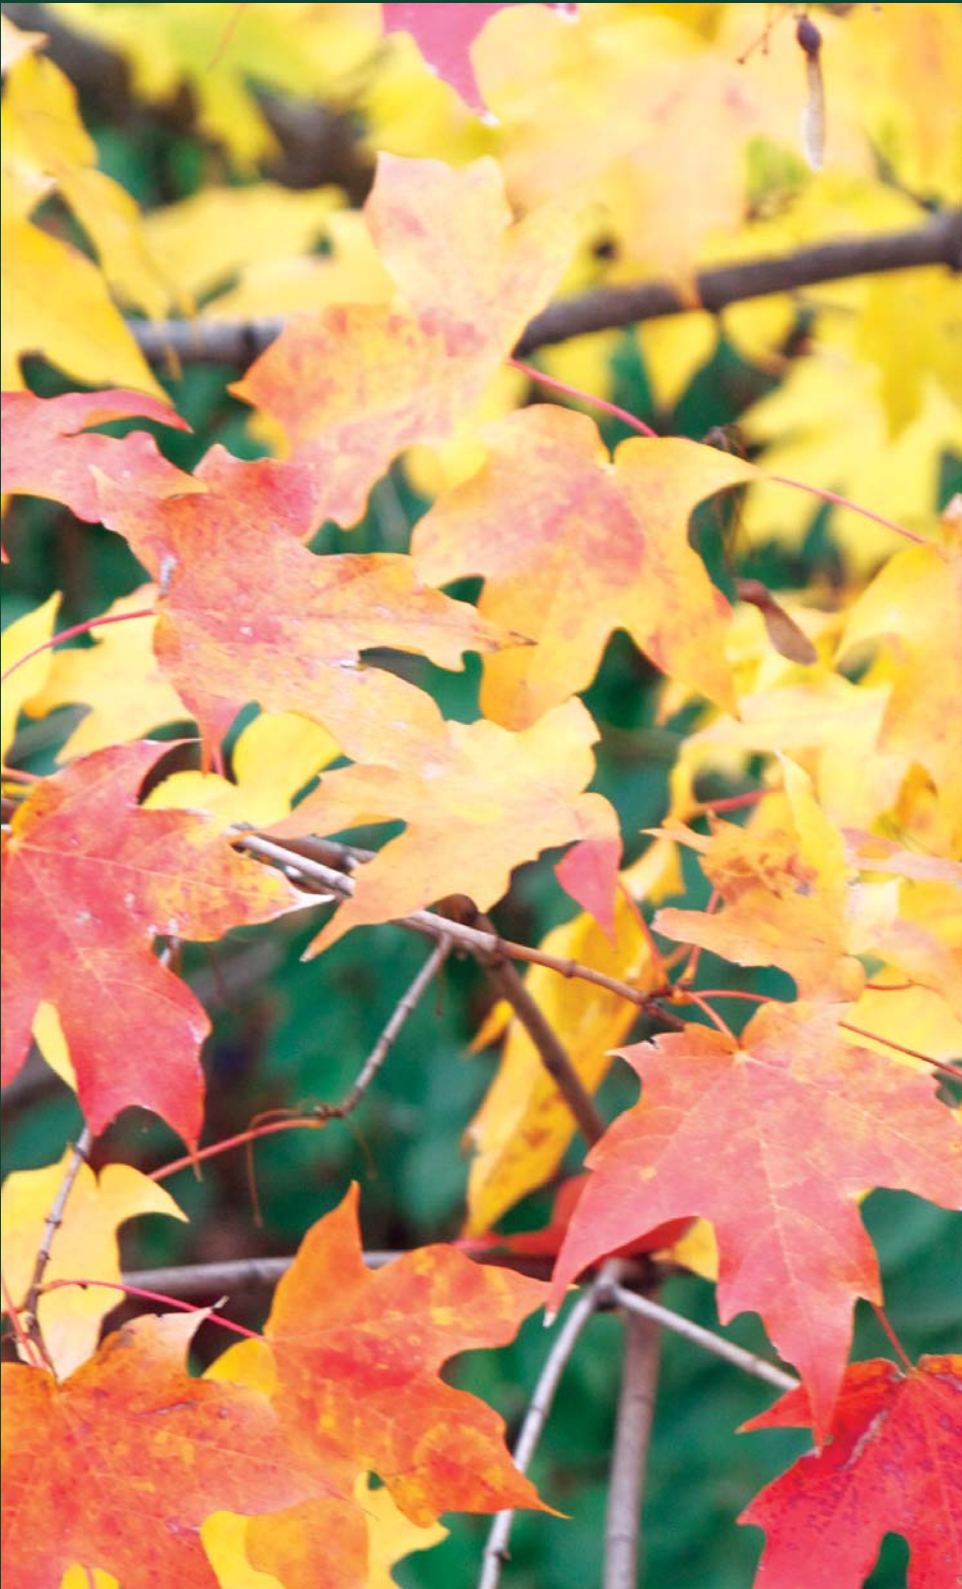

**Sudden Death and Use of  
Stimulant Medications in Youths**

Madelyn S. Gould, Ph.D., M.P.H., et al. 992

**A Molecular Signature of  
Depression in the Amygdala**

Etienne Sibille, Ph.D., et al. 1011

**Evidence for an Interaction  
Between Familial Liability and  
Prenatal Exposure to Infection in  
the Causation of Schizophrenia**

Mary C. Clarke, Ph.D., et al. 1025

**Association of Substance Use  
Disorders With Childhood  
Trauma but not African Genetic  
Heritage in an African American  
Cohort**

Francesca Ducci, M.D., Ph.D., et al. 1031

**Continuing Medical Education 1083**

**September 2009**

**Volume 166 • Number 9**

---

Official Journal of the  
AMERICAN PSYCHIATRIC ASSOCIATION

---

[ajp.psychiatryonline.org](http://ajp.psychiatryonline.org)
