READ

# The American Journal of PSYCHIATRY

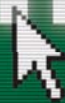

ONLINE

## ONLINE BENEFITS

### AJP in Advance

Receive key research articles posted on the AJP website well in advance of their appearance in print.

### Back Issue Access

Gain access to back issues starting with Volume 1, Issue 1 of the American Journal of Insanity in 1844. (Available to institutions as a separate one-time purchase.)

### AJP CME

Take interactive quizzes that offer AMA PRA Category 1 Credits™ for selected articles from each issue (with paid subscription to the CME Course Program).

### AJP Audio

Listen to MP3-format program summarizing findings from key articles from each issue.

### Residents' Journal

Read additional AJP articles and features that have most value to residents in their training.

### Powerful Searching

Search by author, keyword, and/or citation details within any one journal, across the entire PsychiatryOnline journal collection, or across all HighWire journals.

### PubMed, CrossRef, and Google Scholar links

Explore everything from cited references to abstracts and full text; to similar articles; to other articles by the same lead authors.

### eTOCs

Get advanced email alerts with the table of contents of the latest issue.

**ACTIVATE  
NOW!**

IT'S AS EASY AS...

**2** Under  
SUBSCRIBE  
NOW, click  
"Activate  
Your Online  
Access"

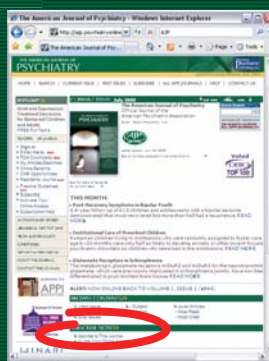

**3** Enter your APA Member Number. (This can be found on your mailing label.)

|                            |                    |
|----------------------------|--------------------|
| AJP <b>3000056866</b>      | CAR-RT LOT88 C-105 |
| John Q Sample              |                    |
| Mental Health Professional |                    |
| 1000 Wilson Blvd STE 1825  |                    |
| Arlington VA 22209-3924    | 01654              |

\*In most cases the number on your label will be your Member Number; if it is not, enter your APA Member Number (with enough leading zeros to create 10 digits).

For more information or if you cannot locate your customer number, please contact APPI Customer Service:

**1.800.368.5777**  
**APPI@PSYCH.ORG**

# get CME from AJP

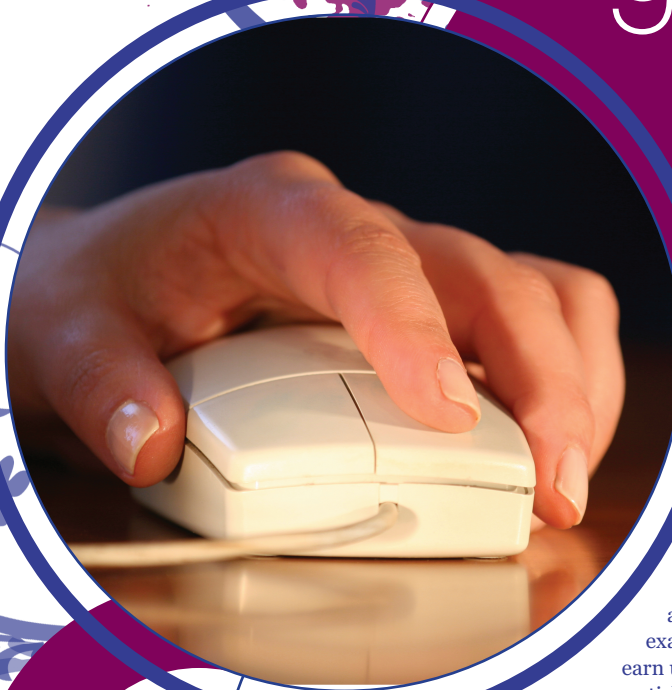

Brief companion exams are created for three of the most influential articles from each issue. By reading the articles and completing the online exams, you can test your knowledge and earn up to 1 AMA PRA Category 1 Credits™ per article. Correct answers are highlighted for your reference upon completion of the course; there is no minimum threshold score necessary for the credit. A link from the question to the correct answer in context will also be highlighted in the associated article, thus extending the learning experience.

CME credit is only provided online, and a subscription to the AJP CME program is required. From the moment you subscribe to the AJP CME program, you will be able to select from 72 courses from among 40 possible subject areas. You'll also be able to access the next 33 courses as they become available. For more information and pricing, please go to <http://cme.psychiatryonline.org/misc/aboutajpcme.shtml>

This activity is sponsored by the American Psychiatric Association. The American Psychiatric Association is accredited by the Accreditation Council for Continuing Medical Education to provide continuing medical education for physicians. The American Psychiatric Association designates this educational activity for a maximum of 1 AMA PRA Category 1 Credits™. Physicians should only claim credit commensurate with the extent of their participation in the activity.

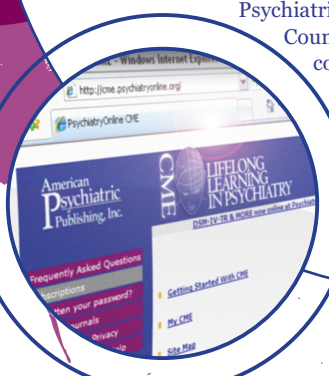

Fulfill your CME requirement while staying current on the latest advances in psychiatry.  
Subscribe to AJP CME!

# The Residents' JOURNAL

## Last Issue's Table of Contents

- 1 Introduction  
Jennifer McLaren, M.D.
- 2 Back to School  
Sarah B. Johnson, M.D.
- 3 Interview with Dr. Robert Zipursky  
Jennifer McLaren, M.D.
- 5 Early Intervention in Psychosis  
Jodi F. Marshall, M.D.
- 7 Autism Spectrum Disorders: Importance of Early Diagnosis and Interventions  
Jennifer McLaren, M.D.

The Residents' Journal is sent free-of-charge to all psychiatry residents. Anyone interested in being included on the distribution list should contact Angela Moore, the Residents' Journal staff editor at [ajp@psych.org](mailto:ajp@psych.org) with "Subscribe to Residents' Journal" in the subject line.

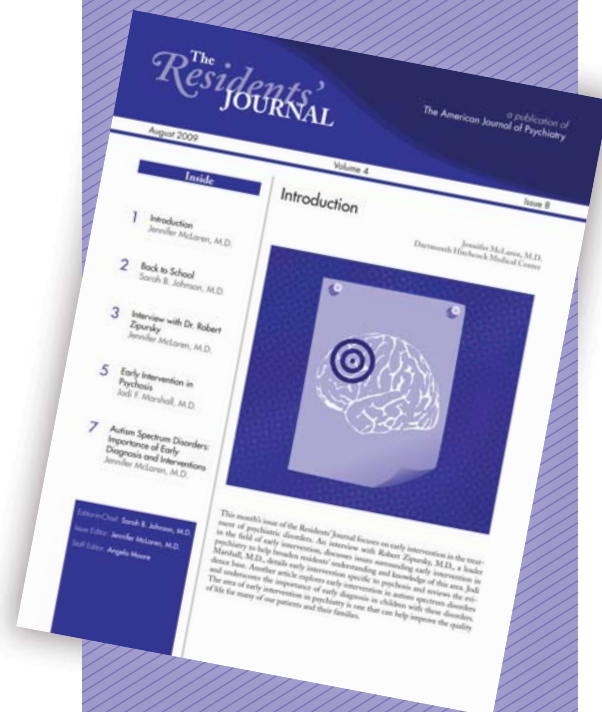

a publication of  
The American Journal of Psychiatry

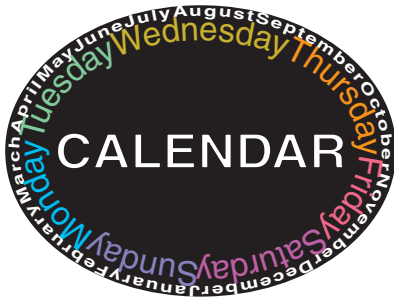

For free listing of your organization's official annual or regional meeting, please send us the following information: sponsor, location, inclusive dates, type and number of continuing education credits (if available), and the name, address, and telephone number of the person or group to contact for more information. In order for an event to appear in our listing, all notices and changes must be received at least 6 months in advance of the meeting and should be addressed to:

*Calendar, American Journal of Psychiatry, 1000 Wilson Boulevard, Suite 1825, Arlington, VA 22209-3901, jblair@psych.org (e-mail).*

*Because of space limitations, only listings of meetings of the greatest interest to Journal readers will be included.*

## OCTOBER 2009

**October 8–11**, 61st Institute on Psychiatric Services, American Psychiatric Association, New York, NY. Contact: Jill Gruber, APA Annual Meetings Dept., 1000 Wilson Blvd., Ste. 1825, Arlington, VA 22209; (703) 907-7815.

**October 27–November 1**, 56th Annual Meeting of the American Academy of Child and Adolescent Psychiatry, Honolulu, HI. Contact: AACAP, 3615 Wisconsin Avenue, N.W., Washington, DC 20016-3007; (202) 966-7300 (tel), (202) 966-2891 (fax), meetings@aacap.org (e-mail), www.aacap.org (web site).

## NOVEMBER

**November 5–6**, 21st Annual Advances in Psychiatry, Ann Arbor, MI. Contact: Office of Continuing Medical Education, University of Michigan Medical School, G1200 Towsley Center, 1500 E. Medical Center Drive, SPC 5201, Ann Arbor, MI 48109-5201; (734) 763-1400 (tel), (734) 936-1641 (fax) OCME@umich.edu (e-mail), http://cme.med.umich.edu (web site).

**November 11–14**, 56th Annual Meeting, Academy of Psychosomatic Medicine, Las Vegas, Nev. Contact: www.apm.org (web site).

## MARCH 2010

**March 17–20**, 21st Annual Meeting, American Neuropsychiatric Association, Tampa, Fla. Contact: www.anpaonline.org (web site).

**March 17–20**, 4th Biennial Conference of the ISBD, San Paulo, Brazil. Contact: isbd2010@icms.com.au (e-mail), www.isbd2010.org (web-site),

## MAY

**May 22–27**, 163rd Annual Meeting of the American Psychiatric Association, New Orleans, LA. Contact: Cathy Nash, APA Annual Meetings Dept., 1000 Wilson Blvd., Ste. 1825, Arlington, VA 22209; (703) 907-7822.

## OCTOBER

**October 14–17**, 62nd Institute on Psychiatric Services, American Psychiatric Association, Boston, MA. Contact: Jill Gruber, APA Annual Meetings Dept., 1000 Wilson Blvd., Ste. 1825, Arlington, VA 22209; (703) 907-7815.

**October 26–31**, 57th Annual Meeting of the American Academy of Child and Adolescent Psychiatry, New York, NY. Contact: AACAP, 3615 Wisconsin Avenue, N.W., Washington, DC 20016-3007; (202) 966-7300 (tel), (202) 966-2891 (fax), meetings@aacap.org (e-mail), www.aacap.org (web site).

## MAY 2011

**May 14–19**, 164th Annual Meeting of the American Psychiatric Association, Honolulu, HI. Contact: Cathy Nash, APA Annual Meetings Dept., 1000 Wilson Blvd., Ste. 1825, Arlington, VA 22209; (703) 907-7822.

**May 20–23**, 54th Annual Meeting of the American Adademy of Psychoanalysis and Dynamic Psychiatry, New Orleans, LA. Contact: Executive Office, American Adademy of Psychoanalysis and Dynamic Psychiatry, PO Box 30, Bloomfield, CT 06002; (888) 691-8281, (860) 286-0787, info@aapdp.org (e-mail), www.aapdp.org (web site).

## OCTOBER

**October 18–23**, 58th Annual Meeting of the American Academy of Child and Adolescent Psychiatry, Toronto, Ontario. Contact: AACAP, 3615 Wisconsin Avenue, N.W., Washington, DC 20016-3007; (202) 966-7300 (tel), (202) 966-2891 (fax), meetings@aacap.org (e-mail), www.aacap.org (web site).

**October 27–30**, 63rd Institute on Psychiatric Services, American Psychiatric Association, San Francisco, CA. Contact: Jill Gruber, APA Annual Meetings Dept., 1000 Wilson Blvd., Ste. 1825, Arlington, VA 22209; (703) 907-7815.

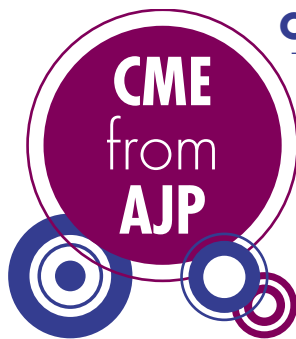

## Continuing Medical Education

Three articles in this issue form the basis of a short course with questions that can be answered for up to 1 hour of category 1 CME credit each by visiting <http://cme.psychiatryonline.org/> and clicking on “American Journal of Psychiatry CME.”

CME credit is issued only online, and a paid subscription to the AJP CME course program is required.

This month's courses appear on pages 1083–1086.

FREE AUDIO!

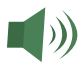

### Have You Heard?

You can listen to highlights of *The American Journal of Psychiatry* by downloading a monthly free .mp3 audio file from our web site (<http://ajp.psychiatryonline.org/misc/audio.dtl>) or by subscribing to the AJP Audio podcast at iTunes or other feed reader (e.g., NewzCrawler, FeedDemon, Bloglines, Google Reader). Presented by Deputy Editor Dr. Susan Schultz or by Editorial Director Michael Roy, each month's audio lasts approximately 30 minutes and covers several research articles, the Treatment in Psychiatry feature, and one or two editorials.

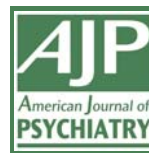

Coming in the October 2009 issue\*

## THE AMERICAN JOURNAL OF PSYCHIATRY

*Familial Aggregation of Suicide Explained by Cluster B Traits:  
A Three-Group Family Study of Suicide Controlling for Major Depressive Disorder*  
A. McGirr, M. Alda, M. Séguin, S. Cabot, A. Lesage, and G. Turecki

*Suicide Attempts, Gender and Sexual Abuse: Data From the British Psychiatric Morbidity Survey 2000*  
P. Bebbington, C. Cooper, S. Minot, T. Brugha, R. Jenkins, H. Meltzer, and M. Dennis

*The Treatment for Adolescents With Depression Study (TADS):  
Outcomes Over 1 Year of Naturalistic Follow-Up*

Treatment for Adolescents With Depression Study (TADS) Team

*A Developmental Twin Study of Church Attendance and Alcohol and Nicotine Consumption:  
A Model for Analyzing the Changing Impact of Genes and Environment*  
K.S. Kendler and J. Myers

\*Can't wait? Visit [ajp.psychiatryonline.org](http://ajp.psychiatryonline.org) and click the “AJP in Advance” logo to see all articles uploaded in advance of print!

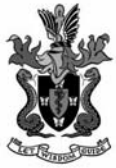

# THE BRITISH JOURNAL OF PSYCHIATRY

August 2009, VOL. 195

|                        |                                                                                                                                                                                                                                        |                |                                                                                                                                                                                                     |
|------------------------|----------------------------------------------------------------------------------------------------------------------------------------------------------------------------------------------------------------------------------------|----------------|-----------------------------------------------------------------------------------------------------------------------------------------------------------------------------------------------------|
| A4                     | <b>Editorial Board</b>                                                                                                                                                                                                                 |                |                                                                                                                                                                                                     |
| A6                     | <b>Highlights of this issue</b>                                                                                                                                                                                                        |                |                                                                                                                                                                                                     |
| <b>Editorials</b>      |                                                                                                                                                                                                                                        |                |                                                                                                                                                                                                     |
| 97                     | <b>Dissecting the phenotype in genome-wide association studies of psychiatric illness</b><br>Cross-Disorder Phenotype Group of the Psychiatric GWAS Consortium                                                                         |                |                                                                                                                                                                                                     |
| 100                    | <b>Do prenatal risk factors cause psychiatric disorder? Be wary of causal claims</b><br>A. Thapar and M. Rutter                                                                                                                        |                |                                                                                                                                                                                                     |
| <b>Special article</b> |                                                                                                                                                                                                                                        |                |                                                                                                                                                                                                     |
| 102                    | <b>Why do antidepressants take so long to work? A cognitive neuropsychological model of antidepressant drug action</b><br>C.J. Harmer, G.M. Goodwin, and P.J. Cowen                                                                    | 155            | <b>Psychiatrists on the Subway - poems by doctors</b><br>Ron Charach                                                                                                                                |
| <b>Review article</b>  |                                                                                                                                                                                                                                        |                |                                                                                                                                                                                                     |
| 109                    | <b>Residential alternatives to acute psychiatric hospital admission: systematic review</b><br>B. Lloyd-Evans, M. Slade, D. Jagielska, and S. Johnson                                                                                   | 156            | <b>Urbanicity of place of birth and symptoms of psychosis, depression and anxiety in Uganda</b><br>P. Lundberg, E. Cantor-Graae, G. Rukundo, S. Ashaba, and P.-O. Östergren                         |
| 117                    | <b>Paging Dr Love - psychiatry in the movies</b><br>Peter Byrne                                                                                                                                                                        | 162            | <b>In a Glass Darkly (1872), J. Sheridan LeFanu - psychiatrists in 19th-century fiction</b><br>Fiona Subotsky                                                                                       |
| <b>Papers</b>          |                                                                                                                                                                                                                                        |                |                                                                                                                                                                                                     |
| 118                    | <b>Levels of anxiety and depression as predictors of mortality: the HUNT study</b><br>A. Mykletun, O. Bjerkeset, S. Overland, M. Prince, M. Dewey, and R. Stewart                                                                      | 163            | <b>Morphometric analysis of neuronal and glial cell pathology in the dorsolateral prefrontal cortex in late-life depression</b><br>A. Khundakar, C. Morris, A. Oakley, W. McMeekin, and A.J. Thomas |
| 126                    | <b>Differences in mortality and suicidal behaviour between treated and never-treated people with schizophrenia in rural China</b><br>M.-S. Ran, C.L.-W. Chan, E.Y.-H. Chen, W.-J. Mao, S.-H. Hu, C.-P. Tang, F.-R. Lin, and Y. Conwell | 170            | <b>Measuring the benefits of treatment for psychosis: validity and responsiveness of the EQ-5D</b><br>G.R. Barton, J. Hodgekins, M. Mugford, P.B. Jones, T. Croudace, and D. Fowler                 |
| 132                    | <b>Early-life origins of schizotypal traits in adulthood</b><br>J. Lahti, K. Räikköen, U. Sovio, J. Miettunen, A.-L. Hartikainen, A. Pouta, A. Taanila, M. Joukamaa, M.-R. Jävelin, and J. Veijola                                     | <b>Columns</b> |                                                                                                                                                                                                     |
| 138                    | <b>Childhood neuropsychological deficits associated with adult obsessive-compulsive disorder</b><br>J.R. Grisham, T.M. Anderson, R. Poulton, T.E. Moffitt, and G. Andrews                                                              | 178            | <b>Correspondence</b>                                                                                                                                                                               |
|                        |                                                                                                                                                                                                                                        | 182            | <b>Corrections</b>                                                                                                                                                                                  |
|                        |                                                                                                                                                                                                                                        | 183            | <b>Book reviews</b>                                                                                                                                                                                 |
|                        |                                                                                                                                                                                                                                        | 186            | <b>Contents of Advances in Psychiatric Treatment</b>                                                                                                                                                |
|                        |                                                                                                                                                                                                                                        | 187            | <b>Contents of the American Journal of Psychiatry</b>                                                                                                                                               |
|                        |                                                                                                                                                                                                                                        | 188            | <b>From the Editor's desk</b>                                                                                                                                                                       |
